# Supplementary material for: The PDZ-Binding Motif of HPV16-E6 Oncoprotein Modulates the Keratinization and Stemness Transcriptional ProfileIn Vivo
Source: Hindawi journal article supplement (doi:10.1155/2017/7868645), 2017-01-01

Supplementary Figure 1

| Downregulated genes |           |            |            |            |             |            |            |  |
|---------------------|-----------|------------|------------|------------|-------------|------------|------------|--|
| Gene                | Enzrld    | logFC      | adj.P.Val  | B          | AveExpr     | t          | P.Value    |  |
| Krtap16-3           | 71369     | -9.6597836 | 0.00695334 | 0.58699227 | 7.43797898  | -6.6167814 | 0.00032859 |  |
| Krtap15             | 26560     | -9.5031783 | 0.00332978 | 2.82069919 | 7.66821437  | -9.2803702 | 3.99E-05   |  |
| Gm10228             | 100040214 | -9.4944663 | 0.01572577 | 1.297946   | 8.23195738  | -4.8882607 | 0.00188869 |  |
| Krtap6-5            | 68484     | -9.2381591 | 0.0186795  | 1.6685198  | 8.10552969  | -4.5879719 | 0.00266308 |  |
| Krtap19-2           | 170651    | -9.1003726 | 0.0024703  | 3.58133219 | 7.0466203   | -10.403417 | 1.91E-05   |  |
| Krt34               | 16672     | -9.0265297 | 0.00734219 | 0.45652192 | 8.38042625  | -6.4844087 | 0.00037104 |  |
| Gm10229             | 100040201 | -9.0079875 | 0.0151188  | 1.2189557  | 9.01085185  | -4.9536506 | 0.00175538 |  |
| Krt33a              | 71888     | -8.8306955 | 0.00664031 | 0.70298856 | 8.21571062  | -6.7363001 | 0.00029492 |  |
| Krtap6-1            | 16700     | -8.8268664 | 0.01717854 | 1.4927304  | 7.28203419  | -4.7290324 | 0.00226433 |  |
| Krtap19-5           | 16704     | -8.7824723 | 0.00496434 | 1.50713662 | 7.63941681  | -7.6160148 | 0.00013894 |  |
| Krtap1-5            | 69664     | -8.7505114 | 0.01378664 | 0.997786   | 8.14260526  | -5.1397528 | 0.00143015 |  |
| Krtap14             | 23927     | -8.6939702 | 0.00316309 | 3.08367099 | 7.48425057  | -9.6534551 | 3.10E-05   |  |
| Krtap19-3           | 77918     | -8.6697807 | 0.00563244 | 1.11208836 | 7.54408447  | -7.1722469 | 0.00020125 |  |
| Krtap8-1            | 16703     | -8.6489601 | 0.02374361 | 2.1253491  | 8.8819581   | -4.2320564 | 0.0040708  |  |
| Krtap9-3            | 75586     | -8.5110047 | 0.00653534 | 0.74067679 | 8.82155123  | -6.7755114 | 0.00028474 |  |
| Krtap19-9b          | 170939    | -8.4136381 | 0.00968429 | 0.1886954  | 7.97914031  | -5.8988641 | 0.00067568 |  |
| Krtap14-6           | 435285    | -8.4012429 | 0.00775565 | 0.31529477 | 8.31664711  | -6.3435469 | 0.00042312 |  |
| Krt86               | 16679     | -8.3569935 | 0.00601566 | 0.90698192 | 7.82105647  | -6.9508062 | 0.0002438  |  |
| Krtap1-1            | 170657    | -8.166549  | 6.79E-05   | 9.07850447 | 6.41772797  | -26.542816 | 6.65E-08   |  |
| Krtap6-3            | 100040249 | -8.1302305 | 0.01917858 | 1.717057   | 7.64739149  | -4.5494409 | 0.00078576 |  |
| Krtap13-1           | 268905    | -7.9384286 | 0.0032761  | 2.91933469 | 7.76212006  | -9.4183188 | 0.00030363 |  |
| Krtap4-2            | 68673     | -7.895653  | 0.00813145 | 0.18926149 | 7.49781985  | -6.2198137 | 0.00045753 |  |
| Krt25               | 70810     | -7.6427047 | 0.01487684 | -1.1800638 | 9.03489     | -4.9860674 | 0.00169325 |  |
| Krt15               | 16665     | -7.5276049 | 0.00543544 | 1.21208836 | 7.64405447  | -7.2242439 | 0.00030125 |  |
| Krt31               | 16660     | -7.3526068 | 0.00387892 | 2.37256186 | 7.65778724  | -8.6761608 | 6.13E-05   |  |
| Gm11567             | 670533    | -7.3074699 | 0.0030803  | 6.79637061 | 7.3869069   | -17.251122 | 6.72E-07   |  |
| Krt27               | 16675     | -7.281297  | 0.01454891 | -1.1247913 | 8.93426855  | -5.0323619 | 0.00160872 |  |
| Krtap19-4           | 170654    | -7.2238368 | 0.00060736 | 6.14503259 | 8.66074188  | -15.486655 | 1.38E-06   |  |
| Tchh                | 99681     | -7.2212843 | 0.01917858 | -1.1888151 | 7.92831879  | -4.5480486 | 0.00279031 |  |
| Krtap6-2            | 16701     | -7.1602903 | 0.0210754  | 1.9007795  | 7.41049708  | -4.4051682 | 0.00330387 |  |
| Krt71               | 56735     | -7.0484731 | 0.008937   | 0.01997858 | 9.00077848  | -6.0565985 | 0.00056733 |  |
| Krt72               | 105866    | -6.9519439 | 6.79E-05   | 9.91351032 | 7.76402553  | -32.353411 | 3.98E-09   |  |
| S100a3              | 20197     | -6.9272543 | 0.00105445 | 5.94007735 | 7.36052524  | -13.735941 | 3.06E-06   |  |
| Krt85               | 53622     | -6.6914978 | 0.0032761  | 2.90242896 | 8.39258228  | -9.3944633 | 3.69E-05   |  |
| Krtap3-3            | 66380     | -6.6382159 | 0.00602672 | 0.92223434 | 6.55417048  | -6.9670712 | 0.00024035 |  |
| Krt33b              | 16671     | -6.6286974 | 0.0248581  | 3.6235658  | 8.37906556  | -10.46984  | 1.83E-05   |  |
| Krtap21-1           | 170656    | -6.6038664 | 0.02604837 | -2.2915079 | 7.97494584  | -4.1061328 | 0.00475172 |  |
| Krt35               | 53617     | -6.5822013 | 0.00053237 | 4.854659   | 7.25349894  | -16.303392 | 9.82E-07   |  |
| Psdor1c2            | 57390     | -6.4834988 | 0.00070678 | 5.93466802 | 7.46922801  | -14.968566 | 1.74E-06   |  |
| Krt13               | 18601     | -6.2118286 | 0.0003803  | 6.82900508 | 7.01052367  | -17.346674 | 6.48E-07   |  |
| Crisp1              | 11571     | -6.180764  | 6.79E-05   | 9.71578694 | 5.22126093  | -30.796464 | 1.34E-08   |  |
| Gp95d               | 93746     | -6.0587842 | 0.0003803  | 6.81171227 | 7.50153235  | -17.295949 | 6.60E-07   |  |
| Crym                | 12971     | -5.9986291 | 6.79E-05   | 9.4672708  | 7.14505227  | -28.980268 | 2.01E-08   |  |
| Spr2h               | 20762     | -5.84495   | 0.00022387 | 7.17610821 | 6.89168403  | -20.435132 | 2.15E-07   |  |
| Pinlyp              | 641361    | -5.7089919 | 0.0283954  | -2.4666502 | 8.15522207  | -3.9752717 | 0.00594442 |  |
| Gjb2                | 14619     | -5.7053977 | 0.00442462 | 1.91964493 | 8.55678253  | -8.1054918 | 9.42E-05   |  |
| Ly6gd               | 114654    | -5.3992728 | 0.00129865 | 4.95224474 | 6.68105212  | -12.821069 | 4.86E-06   |  |
| Krt75               | 109052    | -5.3761687 | 0.00316309 | 3.0756106  | 8.02108335  | -7.6420008 | 3.12E-05   |  |
| Fbp1                | 14121     | -5.2872102 | 0.0003803  | 6.84902964 | 7.10057383  | -17.405674 | 6.33E-07   |  |
| Krtap28-13          | 71386     | -5.237678  | 0.00249815 | 3.56659908 | 6.56819178  | -10.380338 | 1.94E-05   |  |
| Krt81               | 64818     | -5.1872723 | 0.00345122 | 2.68065157 | 8.80600429  | -9.0870969 | 4.57E-05   |  |
| Spr1b               | 20754     | -5.1805402 | 0.00039922 | 7.27176925 | 5.73339882  | -18.608216 | 4.04E-07   |  |
| S43042121           | 100126226 | -5.1498534 | 0.00129865 | 4.94636452 | 8.39000264  | -12.809399 | 4.89E-06   |  |
| Dusp19-1            | 16694     | -4.9402914 | 0.00016372 | 8.15445148 | 6.13592859  | -21.995004 | 3.13E-07   |  |
| Krtap3-1            | 69473     | -4.6536851 | 0.00476803 | 1.68092716 | 8.14275807  | -7.8188478 | 0.00011797 |  |
| Gjb6                | 14623     | -4.648227  | 6.79E-05   | 9.14834594 | 6.31974171  | -26.952578 | 3.29E-08   |  |
| Krtap5-2            | 71623     | -4.5253687 | 0.00129865 | 4.99919555 | 6.61745673  | -12.914706 | 4.63E-06   |  |
| Spsbs               | 66183     | -4.43117   | 0.00060736 | 6.1348964  | 5.22608732  | -15.461071 | 1.40E-06   |  |
| Krtap5-4            | 50775     | -4.3590852 | 0.0003803  | 6.89137876 | 6.10848111  | -17.531388 | 6.03E-07   |  |
| Cryba4              | 12959     | -4.1570885 | 6.79E-05   | 9.15505162 | 6.01232053  | -26.992521 | 3.26E-08   |  |
| Krt82               | 114566    | -4.1226182 | 6.79E-05   | 9.38345648 | 5.2812735   | -28.420612 | 2.30E-08   |  |
| Pmel                | 20431     | -4.1214813 | 0.00022387 | 7.7284363  | 7.8307095   | -20.313504 | 2.24E-07   |  |
| Krt5                | 16670     | -4.064303  | 0.00175114 | 4.8771818  | 7.03538396  | -11.936582 | 7.79E-06   |  |
| Krtap5-1            | 50774     | -4.0233897 | 0.00180648 | 4.22432748 | 6.94609227  | -11.466524 | 1.01E-05   |  |
| Padl1               | 18599     | -4.0041111 | 0.00301117 | 3.2118217  | 6.2112009   | -9.8409986 | 2.74E-05   |  |
| Tyrp1               | 22178     | -3.9746449 | 0.0016372  | 8.10979393 | 7.54812763  | -21.808571 | 1.38E-07   |  |
| Tyrp2               | 22173     | -3.950363  | 0.0012467  | 8.46945137 | 5.58278742  | -23.38713  | 8.62E-08   |  |
| Mx2                 | 17702     | -3.7229744 | 0.00230811 | 3.757189   | 6.2940312   | -10.683023 | 1.61E-05   |  |
| Capn12              | 60594     | -3.4927592 | 6.79E-05   | 8.96992145 | 6.77152474  | -25.927486 | 4.28E-08   |  |
| Trpm1               | 17364     | -3.4857377 | 0.00093347 | 5.58873006 | 5.38635127  | -14.16443  | 2.51E-06   |  |
| Hoxc13              | 15422     | -3.4569443 | 0.00345128 | 2.65185897 | 6.03843264  | -9.0479376 | 4.69E-05   |  |
| Serpinb11           | 66957     | -3.4233768 | 0.00678815 | 0.64647263 | 6.60724276  | -6.6778497 | 0.00031088 |  |
| Krt84               | 16680     | -3.3337339 | 0.01924178 | -1.7249652 | 6.3268073   | -4.5431798 | 0.00280628 |  |
| Spr1a               | 20753     | -3.2402857 | 0.00905816 | -0.0146628 | -11.1367973 | -6.0236033 | 0.00057492 |  |
| Ptgd3               | 19215     | -3.1890931 | 0.00027882 | 7.48733498 | 6.47768665  | -19.448533 | 3.00E-07   |  |
| Dct                 | 13190     | -3.1420919 | 0.00076913 | 5.79899325 | 9.02441882  | -14.646159 | 2.01E-06   |  |
| Alt2a               | 192113    | -3.0696148 | 0.02245014 | -2.0161871 | 7.65682389  | -4.3157735 | 0.00067786 |  |
| Slc40a1             | 53945     | -3.0093546 | 0.00029026 | 7.39586443 | 8.56122995  | -19.134865 | 3.35E-07   |  |
| Dusp14              | 56405     | -2.9973813 | 0.00115149 | 5.26014918 | 8.4277102   | -13.450447 | 3.54E-06   |  |
| Dlx3                | 13393     | -2.9972359 | 0.00499216 | 1.48290572 | 6.76464469  | -7.5881139 | 0.00014214 |  |
| Ggt1                | 14598     | -2.9471938 | 0.00029026 | 7.34198175 | 5.56385584  | -18.953607 | 3.57E-07   |  |
| Pnc1                | 12173     | -2.9369059 | 0.0147349  | -1.0622794 | 7.01387758  | -5.085041  | 0.0015182  |  |
| Fla2g2e             | 26970     | -2.9361919 | 0.00124377 | 5.12564996 | 6.85519011  | -13.171022 | 4.07E-06   |  |
| Car6                | 12353     | -2.8923286 | 0.0094985  | -0.134287  | 8.03049252  | -5.909626  | 0.00064311 |  |
| Bambi               | 68010     | -2.8571454 | 0.00124377 | 5.09330283 | 7.52853275  | -13.104876 | 4.21E-06   |  |
| Phod3               | 225288    | -2.7697668 | 0.00053722 | 6.41339237 | 7.65652393  | -16.182414 | 1.03E-06   |  |
| Alox8               | 11688     | -2.7465289 | 0.0027572  | 3.40624753 | 5.28668926  | -10.132812 | 2.27E-05   |  |
| Oca2                | 18431     | -2.7243355 | 0.0005748  | 6.31641376 | 5.5153515   | -15.926208 | 1.15E-06   |  |
| Capn8               | 170725    | -2.700174  | 0.00114369 | 5.29109359 | 6.41647152  | -13.515757 | 3.43E-06   |  |
| Dsc2                | 13506     | -2.6508519 | 0.00499216 | 1.47585445 | 7.00759587  | -7.5800119 | 0.00014308 |  |
| C34                 | 12480     | -2.5507414 | 0.00432557 | -1.5670492 | 5.45660038  | -13.450447 | 0.00000354 |  |
| Foxm1               | 15218     | -2.4996934 | 0.00371081 | 2.51558412 | 5.89367439  | -8.8648519 | 0.00005325 |  |
| Gabpr               | 216643    | -2.4495732 | 0.00337858 | 2.77843329 | 6.50495463  | -9.2213503 | 4.16E-05   |  |
| Ehf5                | 13711     | -2.4246661 | 0.00171495 | 5.67959656 | 5.65096848  | -12.100821 | 7.12E-06   |  |
| Slc39a8             | 67547     | -2.4074203 | 0.0017167  | 4.60167127 | 8.19004492  | -12.146768 | 6.94E-06   |  |
| Xnp8                | 170812    | -2.4032746 | 0.00920666 | -0.0578635 | 6.07174669  | -5.9826447 | 0.00059844 |  |
| Pad4                | 18602     | -2.3733842 | 0.0013684  | 4.8596651  | 5.9060039   | -12.631577 | 5.36E-06   |  |

| Upregulated genes |        |            |            |            |            |            |            |  |
|-------------------|--------|------------|------------|------------|------------|------------|------------|--|
| Gene              | Enzrld | logFC      | adj.P.Val  | B          | AveExpr    | t          | P.Value    |  |
| Bst2              | 69550  | 1.50021587 | 0.01471391 | -1.1459269 | 8.23732827 | 5.01462805 | 0.00164053 |  |
| Pvalb             | 19293  | 1.50051682 | 0.00358752 | 2.57082611 | 12.4884844 | 8.93862493 | 5.07E-05   |  |
| Lcp2              | 16822  | 1.50074925 | 0.02990395 | -2.5785375 | 7.4661842  | 8.8962589  | 0.00021033 |  |
| Capn3             | 12335  | 1.50116162 | 0.00371081 | 2.51293382 | 6.99358166 | 8.36217669 | 5.36E-05   |  |
| Vapb              | 56491  | 1.50199133 | 0.00325172 | 3.02708799 | 8.69406292 | 9.57182447 | 3.27E-05   |  |
| hgb2              | 16414  | 1.50211456 | 0.01923983 | -1.7242883 | 8.42097271 | 4.54371551 | 0.00280452 |  |
| Samsn1            | 67742  | 1.5035704  | 0.0129471  | -0.7708148 | 6.51850326 | 5.33531453 | 0.00115896 |  |
| Frbz              | 20378  | 1.51191117 | 0.00500357 | 1.45084504 | 6.96412674 | 7.55133767 | 0.00014649 |  |
| Vcam1             | 23239  | 1.51234115 | 0.0032761  | 2.87304288 | 8.89256701 | 9.35314239 | 3.80E-05   |  |

|            |        |            |            |            |            |            |            |
|------------|--------|------------|------------|------------|------------|------------|------------|
| Chac1      | 69065  | -2.3380354 | 0.00479326 | 1.66548229 | 8.49202138 | -7.800626  | 0.0001197  |
| Nfe2l3     | 18025  | -2.3057784 | 0.00345128 | 2.65746476 | 7.82345707 | -9.055486  | 4.67E-05   |
| Mycn       | 18109  | -2.3046961 | 0.00175114 | 4.39863105 | 5.31171891 | -11.775176 | 8.51E-06   |
| Gnpmp      | 93695  | -2.24886   | 0.00411359 | 2.13927171 | 8.53125807 | -8.3778265 | 7.65E-05   |
| Cenbf      | 108000 | -2.24688   | 0.00096657 | 5.52882999 | 6.06395008 | -14.030813 | 2.67E-06   |
| Ctse       | 13034  | -2.2374723 | 0.00254727 | 3.53657365 | 5.85855159 | -10.333516 | 2.00E-05   |
| Ctpts      | 51797  | -2.2312293 | 0.00177998 | 4.30070813 | 6.3400757  | -11.600633 | 3.99E-06   |
| Acc2       | 70008  | -2.210187  | 0.00346397 | 2.64213868 | 7.65176218 | -9.0347555 | 4.74E-05   |
| Gsdma      | 57911  | -2.2026122 | 0.00283455 | 3.3587617  | 7.98602277 | -10.060713 | 2.37E-05   |
| Krt36      | 16673  | -2.1852516 | 0.01432213 | 1.0823692  | 7.43596181 | -5.0680737 | 0.00154672 |
| Otub2      | 68149  | -2.182648  | 0.0003803  | 6.8687486  | 7.41870939 | -17.464051 | 6.19E-07   |
| Dnase1l2   | 66705  | -2.1676732 | 0.0032761  | 2.88178663 | 8.09323131 | 9.365418   | 3.76E-05   |
| Fxyd4      | 108017 | -2.1647508 | 0.0048204  | 1.53851304 | 6.21004451 | -7.6522799 | 0.00011349 |
| Lhx2       | 16870  | -2.1227786 | 0.01042441 | -0.3572743 | 7.33835374 | -5.7043857 | 0.00079002 |
| Trim59     | 66949  | -2.1134684 | 0.00071873 | 5.89031575 | 7.85283842 | -14.862249 | 1.82E-05   |
| Tgm3       | 21818  | -2.0859673 | 0.00405403 | 4.22540871 | 6.41887389 | -8.4869785 | 7.05E-05   |
| Dag2       | 13511  | -2.0811643 | 0.01417349 | -1.0610693 | 7.9066718  | -5.0860642 | 0.0015165  |
| Aspm       | 12316  | -2.0750628 | 0.0032761  | 2.93048044 | 5.73872311 | -9.4340801 | 3.39E-05   |
| Mkem229b   | 268567 | -2.0737996 | 0.00326937 | 2.99799489 | 7.77569434 | -9.5301285 | 3.37E-05   |
| Mki67      | 17345  | -2.0700216 | 0.00451807 | 1.83357039 | 8.52416968 | -8.0010407 | 0.00010216 |
| Gata2b2    | 229542 | -2.0551678 | 0.00811851 | 0.20511388 | 8.33423848 | -6.2352686 | 0.00046877 |
| Tip2       | 21873  | -2.0511731 | 0.00177098 | 4.30744838 | 6.602044   | -11.612552 | 9.33E-06   |
| Ass1       | 11898  | -2.0444757 | 0.00489775 | 1.60723082 | 7.91289879 | -7.7322475 | 0.00012645 |
| Krt18      | 16668  | -2.0126937 | 0.00524652 | 1.2939586  | 5.13717374 | -7.373645  | 0.00016972 |
| Dlx2       | 13392  | -1.992994  | 0.00536175 | 1.20923834 | 5.13628483 | -7.2792253 | 0.00018375 |
| Lap3       | 66988  | -1.979988  | 0.00059485 | 6.22136337 | 10.1404033 | -15.680353 | 1.27E-06   |
| Klf2c      | 73804  | -1.9684906 | 0.00193691 | 4.0875724  | 5.36218929 | -11.230747 | 1.16E-05   |
| Ccnb2      | 12442  | -1.9639552 | 0.00892195 | 0.02939859 | 6.94983235 | -6.0655943 | 0.00055188 |
| Corin      | 53419  | -1.9516372 | 0.00490871 | 1.58058243 | 4.65635797 | -7.7011476 | 0.00012966 |
| Tgfa       | 21802  | -1.9493854 | 0.00356989 | 2.58168154 | 7.45464204 | -8.9531927 | 5.02E-05   |
| Sfn        | 55948  | -1.9429397 | 0.00490404 | 2.18423389 | 9.17888905 | -8.434634  | 7.33E-05   |
| Rnf149     | 67702  | -1.9388032 | 0.00339133 | 2.7523996  | 9.40655832 | -9.1854137 | 4.26E-05   |
| Cdkn1a     | 12575  | -1.9107739 | 0.01307703 | -0.8950146 | 9.24437529 | -5.2277128 | 0.00130027 |
| Cdc20      | 107995 | -1.9088002 | 0.00406269 | 2.1445291  | 7.92858534 | -8.4730204 | 7.12E-05   |
| Ncagp      | 54392  | -1.9084293 | 0.00830407 | 0.14064738 | 5.24734059 | -6.1726023 | 0.00049771 |
| Zfp148     | 22673  | -1.876419  | 0.00177098 | 4.34459055 | 8.37904302 | -11.678484 | 8.99E-06   |
| Lce3a      | 545548 | -1.87471   | 0.0013684  | 4.87306683 | 4.53732711 | -12.664988 | 5.27E-06   |
| Cyp2s1     | 74134  | -1.8637103 | 0.00175114 | 4.448173   | 6.80514989 | -11.864624 | 8.10E-06   |
| Bdnf       | 71911  | -1.8599937 | 0.00124377 | 5.16079821 | 6.79591749 | -13.243356 | 3.92E-06   |
| Sic39a6    | 106957 | -1.8468527 | 0.00102625 | 5.44553794 | 9.5291521  | -13.84763  | 2.92E-06   |
| Jmy        | 57748  | -1.8455411 | 0.00311773 | 3.1192228  | 7.59619636 | -9.7051105 | 2.99E-05   |
| Gpr143     | 18241  | -1.8433365 | 0.00175114 | 4.38716229 | 4.80859635 | -11.75458  | 8.61E-06   |
| Tmad5f1    | 17112  | -1.8432075 | 0.00230811 | 3.72072788 | 10.3193633 | -10.624391 | 1.67E-05   |
| Epha4      | 13838  | -1.8380985 | 0.0053522  | 1.21834388 | 6.7643843  | -7.2893225 | 0.00018219 |
| Kif11      | 16551  | -1.8305248 | 0.00604156 | 0.9042138  | 5.20091699 | -6.9478577 | 0.00024443 |
| Dusp2      | 13537  | -1.822837  | 0.00340738 | 2.71626953 | 6.61689836 | -9.1357724 | 4.41E-05   |
| Sgo1       | 72415  | -1.8191265 | 0.00344293 | 2.6965307  | 6.42520051 | -9.1087653 | 4.50E-05   |
| Prsc1      | 56742  | -1.8136419 | 0.00129865 | 4.95524966 | 6.61251432 | -12.827037 | 4.85E-06   |
| Pthlh      | 19227  | -1.8114765 | 0.00230811 | 3.78954575 | 5.76835784 | -10.73535  | 1.56E-05   |
| Nusap1     | 108907 | -1.8047442 | 0.00124377 | 5.09786429 | 6.57264013 | -13.114179 | 4.19E-06   |
| Top2a      | 21973  | -1.7991042 | 0.01898273 | -1.6999399 | 8.0064598  | -4.563009  | 0.00274186 |
| Ccnb1      | 268697 | -1.7863356 | 0.0090867  | -0.0232478 | 6.70601172 | -6.0154472 | 0.00057952 |
| Cep55      | 74107  | -1.772537  | 0.00439501 | 1.94795194 | 5.6208938  | -8.1401232 | 9.17E-05   |
| Bub1       | 12235  | -1.767583  | 0.01182839 | -0.6518024 | 5.52811884 | -5.4397955 | 0.00103796 |
| Spint1     | 20732  | -1.7659078 | 0.00937068 | -0.0994005 | 7.61205343 | -5.9434597 | 0.00062196 |
| Guca1b     | 107477 | -1.7521538 | 0.00375721 | 2.47785152 | 5.76815773 | -8.8148059 | 5.54E-05   |
| Z810417H13 | 68026  | -1.7517512 | 0.00669262 | 0.68901957 | 8.73326082 | -6.7218141 | 0.00029879 |
| Pbk        | 52033  | -1.7400266 | 0.00564303 | 1.10549621 | 7.68016306 | -7.1650372 | 0.0002025  |
| Skh26      | 70415  | -1.7275888 | 0.00474722 | 1.72198838 | 7.11600453 | -7.8674805 | 0.00011335 |
| Uox        | 22262  | -1.7148746 | 0.00395025 | 2.30160009 | 4.80407542 | -8.5846603 | 6.56E-05   |
| S114       | 19143  | -1.7144306 | 0.00248703 | 3.59776294 | 8.39266901 | -10.429205 | 1.88E-05   |
| Sic5a8     | 216225 | -1.7115565 | 0.01341718 | 0.90954    | 4.76702014 | -5.2152223 | 0.00131789 |
| Sox9       | 20682  | -1.7114669 | 0.01719557 | -1.4969417 | 7.68753266 | -4.7256249 | 0.00227128 |
| Ect2       | 13605  | -1.7069222 | 0.0053522  | 1.22433697 | 5.9174407  | -7.295975  | 0.00018117 |
| Csdc2      | 105859 | -1.6978172 | 0.01010235 | -0.2750446 | 5.47310748 | -5.7798478 | 0.00073202 |
| Endou      | 19011  | -1.6951622 | 0.00628551 | 0.81313103 | 8.47769441 | -6.8514238 | 0.00026612 |
| Phlda2     | 22113  | -1.695006  | 0.00230811 | 3.79547821 | 5.18451297 | -10.744974 | 1.55E-05   |
| B3gnt5     | 108105 | -1.6920566 | 0.0050698  | 1.35775444 | 5.03021034 | -7.4454509 | 0.00015987 |
| Tfap2a     | 21418  | -1.6870382 | 0.00474722 | 1.69739343 | 8.19626862 | -7.8383173 | 0.00011616 |
| Vdr        | 22337  | -1.6864446 | 0.00734782 | 0.44539917 | 8.34555139 | -6.4732228 | 0.0003749  |
| Hmmr       | 15366  | -1.6762798 | 0.00490871 | 1.57351686 | 6.13259196 | -7.6929206 | 0.00013053 |
| Lpin3      | 64899  | -1.674116  | 0.00224938 | 3.910809   | 6.98501526 | -10.933956 | 1.38E-05   |
| Sytl2      | 83671  | -1.6705712 | 0.00194487 | 4.07058945 | 7.99290697 | -11.201848 | 1.18E-05   |
| Upp1       | 22271  | -1.6630543 | 0.00180648 | 4.2310938  | 6.82118062 | -11.478334 | 1.01E-05   |
| Cacna2d3   | 12294  | -1.6627505 | 0.00730787 | 0.46920442 | 5.09056008 | -6.497182  | 0.00036669 |
| Strae      | 20897  | -1.6617895 | 0.00457224 | 1.79691809 | 5.87980439 | -7.9569408 | 0.00010575 |
| Fgfr3      | 14184  | -1.6444035 | 0.0018393  | 4.17126055 | 8.45965934 | -11.37438  | 1.07E-05   |
| Ccna2      | 12428  | -1.6389159 | 0.0099163  | -0.2456197 | 7.30024706 | -5.8070249 | 0.00071232 |
| Gja1       | 14609  | -1.6366587 | 0.00180648 | 4.26591984 | 10.8162013 | -11.539333 | 9.72E-06   |
| Dsp        | 109620 | -1.6308063 | 0.0033431  | 2.80949332 | 9.50762799 | -9.2644098 | 4.04E-05   |
| Prpf40a    | 56194  | -1.6084697 | 0.01060809 | -0.396895  | 7.94284772 | -5.6682785 | 0.00081957 |
| Atp2c2     | 69047  | -1.6075152 | 0.02108483 | -1.9027748 | 6.32257661 | -4.4036148 | 0.000331   |
| Shcbp1     | 20419  | -1.6044982 | 0.0050698  | 1.36401796 | 6.90376441 | -7.452534  | 0.00015893 |
| Cldn4      | 12740  | -1.6012158 | 0.00474722 | 1.71180211 | 7.70113212 | -7.8553903 | 0.00011459 |
| Klf20a     | 19348  | -1.5930869 | 0.0217724  | -1.9684687 | 5.67995768 | -4.3526237 | 0.00351832 |
| Sic16a6    | 104681 | -1.5894001 | 0.01725163 | -1.5042383 | 6.68086732 | -4.7197241 | 0.0022867  |
| Cdk1       | 12534  | -1.5893416 | 0.01719557 | 1.4977219  | 7.33474137 | -4.7254005 | 0.00227186 |
| Ap1m2      | 11768  | -1.5887892 | 0.00180648 | 4.22584082 | 7.82885552 | -11.469164 | 1.01E-05   |
| Fam26e     | 103511 | -1.5832673 | 0.00797643 | 0.24791567 | 7.63145216 | -6.2771458 | 0.00045049 |
| Fads3      | 60527  | -1.5717904 | 0.0086064  | 0.09233781 | 9.0956094  | -6.1259593 | 0.00052055 |
| Cdca5      | 67849  | -1.5673195 | 0.00813145 | 0.18521392 | 6.39304389 | -6.2158723 | 0.00047752 |
| Ovol1      | 18426  | -1.56707   | 0.00586909 | 1.03885458 | 7.00157912 | -7.0925014 | 0.00021552 |
| Tbx1       | 21380  | -1.5648367 | 0.0135236  | -0.963312  | 7.498852   | -5.1691514 | 0.0013852  |
| Pkp3       | 56460  | -1.5600827 | 0.00410762 | 2.1507635  | 7.95251118 | -8.3923111 | 7.57E-05   |
| Med1       | 19014  | -1.559927  | 0.00476803 | 1.68347182 | 7.93119602 | -7.8218537 | 0.00011769 |
| Pard6b     | 58220  | -1.5584656 | 0.0053522  | 1.23020973 | 4.97509194 | -7.3024989 | 0.00018018 |
| Srms       | 20811  | -1.5578932 | 0.0038163  | 2.41867397 | 6.44216104 | -8.7368724 | 5.86E-05   |
| Car2       | 12349  | -1.5567473 | 0.00750708 | 0.39518721 | 6.90793818 | -6.4229167 | 0.00039283 |
| Elovl3     | 12686  | -1.5557336 | 0.00583992 | 1.051972   | 9.10206123 | -7.110231  | 0.00021225 |
| Acpp       | 56318  | -1.5482891 | 0.00529319 | 1.26692737 | 8.50482077 | -7.3434035 | 0.00017408 |
| Fgf22      | 67112  | -1.5432191 | 0.00415503 | 2.08724004 | 7.15459585 | -8.3125404 | 8.04E-05   |
| Ai661453   | 224833 | -1.538565  | 0.00609398 | 0.87219255 | 7.85673028 | -6.9138265 | 0.00025185 |
| Spc25      | 66442  | -1.5187561 | 0.00536175 | 1.20975779 | 6.43358023 | -7.279801  | 0.00018366 |
| Sdc1       | 20969  | -1.5148682 | 0.00526953 | 1.28255009 | 10.0172441 | -7.3608683 | 0.00017155 |
| Ncapb      | 215387 | -1.5129984 | 0.00442929 | 1.90577882 | 7.28035835 | -8.0885833 | 9.54E-05   |
| Cited4     | 56222  | -1.5117    | 0.00175114 | 4.49926188 | 7.51005002 | -11.957682 | 7.70E-06   |
| Cks2       | 66197  | -1.5097838 | 0.00175114 | 4.41525925 | 8.39702889 | -11.805112 | 8.37E-06   |

|          |        |            |            |            |            |            |            |
|----------|--------|------------|------------|------------|------------|------------|------------|
| Fxyd2    | 11936  | 1.90474313 | 0.00483469 | 1.64335746 | 8.00239784 | 7.77459047 | 0.00012222 |
| Serinc3  | 26943  | 1.91183997 | 0.00490871 | 1.58773359 | 5.41363834 | 7.7094822  | 0.00012879 |
| Gpt2     | 108682 | 1.91894135 | 0.00230811 | 3.74895351 | 5.75127257 | 10.6697495 | 1.62E-05   |
| P2rx4    | 18438  | 1.92305854 | 0.00910829 | -0.0346313 | 8.25751677 | 10.0046518 | 0.00058568 |
| Infrsf21 | 94185  | 1.92403888 | 0.00230811 | 3.81884652 | 5.55329808 | 7.72829748 | 1.51E-05   |
| Coro1c   | 23790  | 1.92977247 | 0.02072228 | -1.865208  | 5.953982   | 4.43210    |            |

Supplementary Figure 2

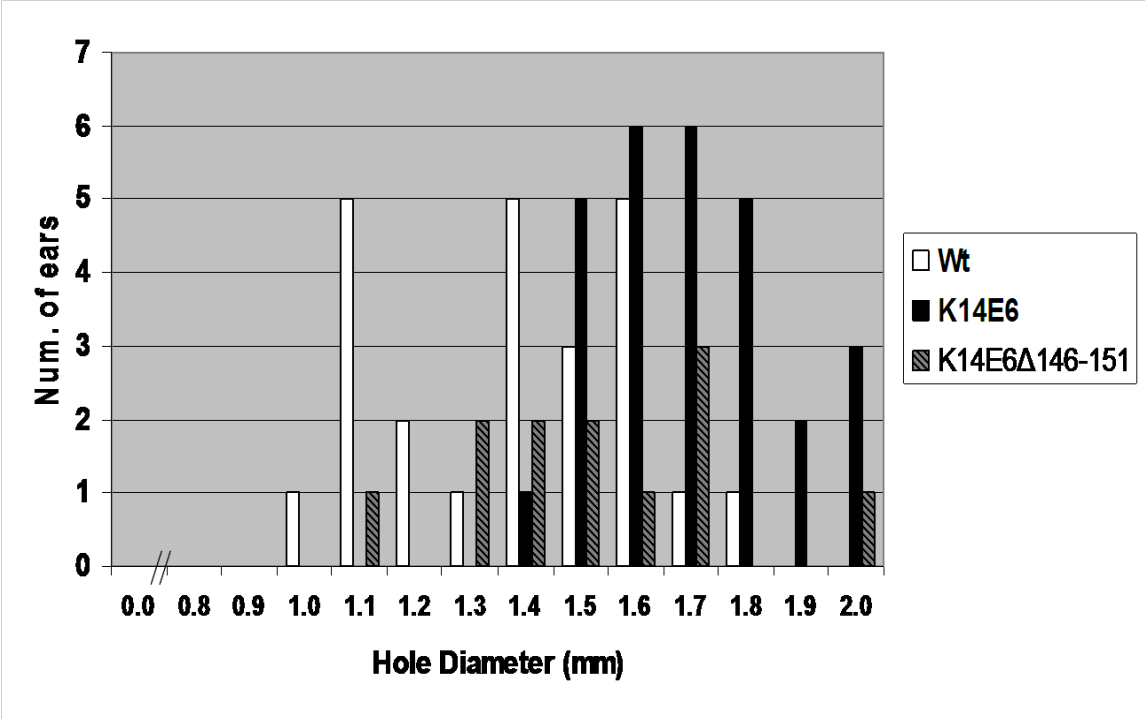

Supplement: f1 [file 7868645.f1.pdf]
